# Supplementary material for: Linking reported drought impacts with drought indices, water scarcity and aridity: the case of Kenya
Source: Copernicus journal article supplement (doi:10.5194/nhess-23-2915-2023), 2023-09-01
Supplement: Supplementary file 1 [file nhess-23-2915-2023-supplement.pdf]

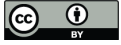

*Supplement of*

## **Linking reported drought impacts with drought indices, water scarcity and aridity: the case of Kenya**

**Marleen R. Lam et al.**

*Correspondence to:* Marleen R. Lam ([marleen.lam@icloud.com](mailto:marleen.lam@icloud.com)) and Adriaan J. Teuling ([ryan.teuling@wur.nl](mailto:ryan.teuling@wur.nl))

The copyright of individual parts of the supplement might differ from the article licence.

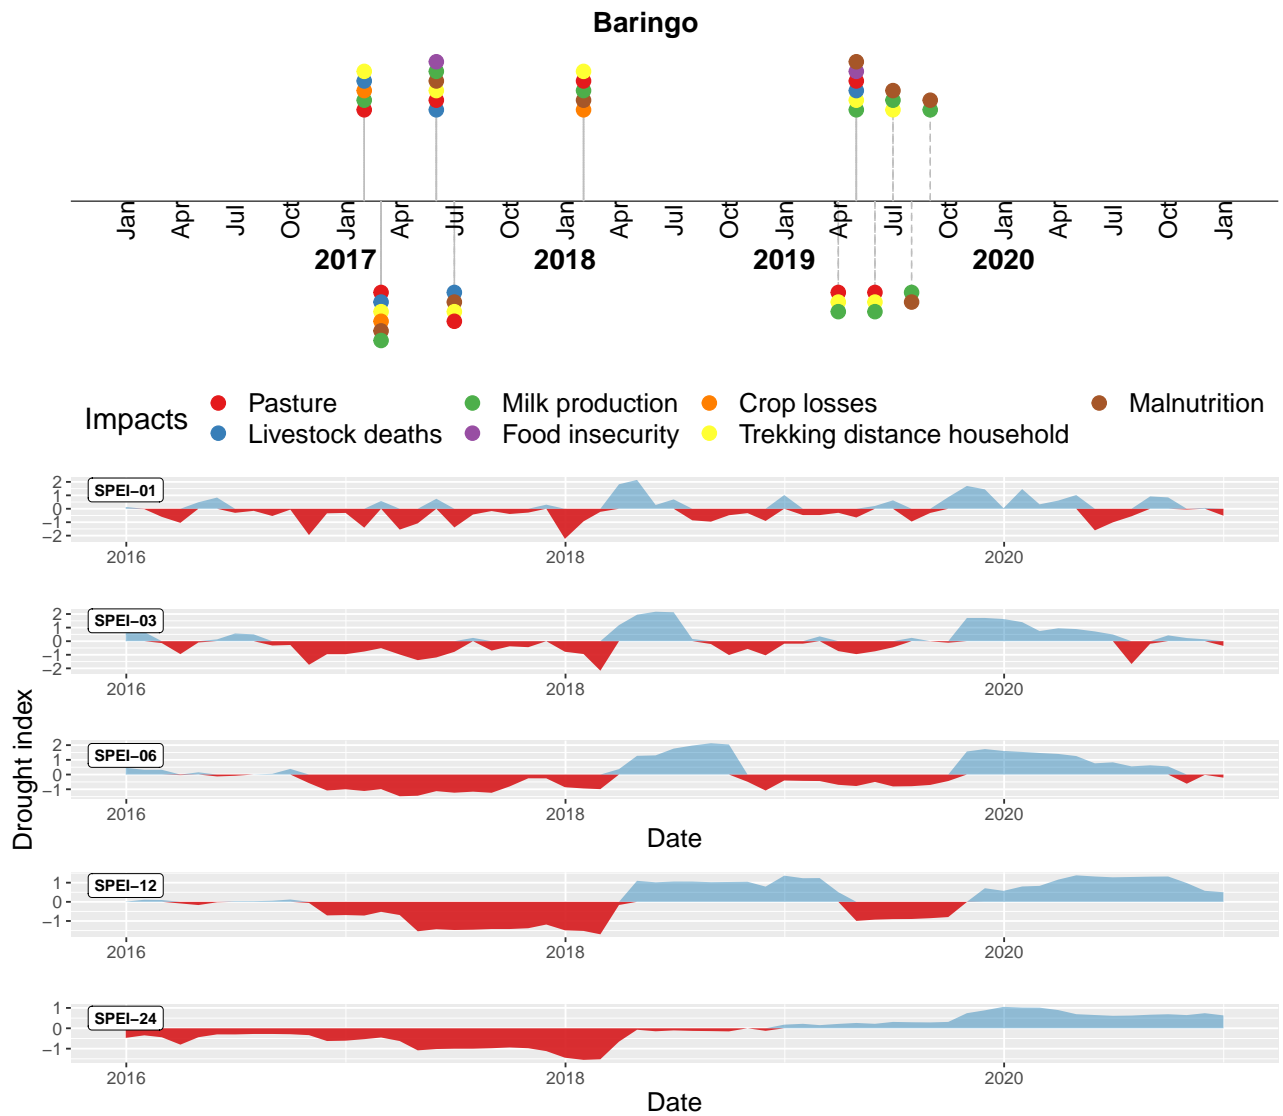

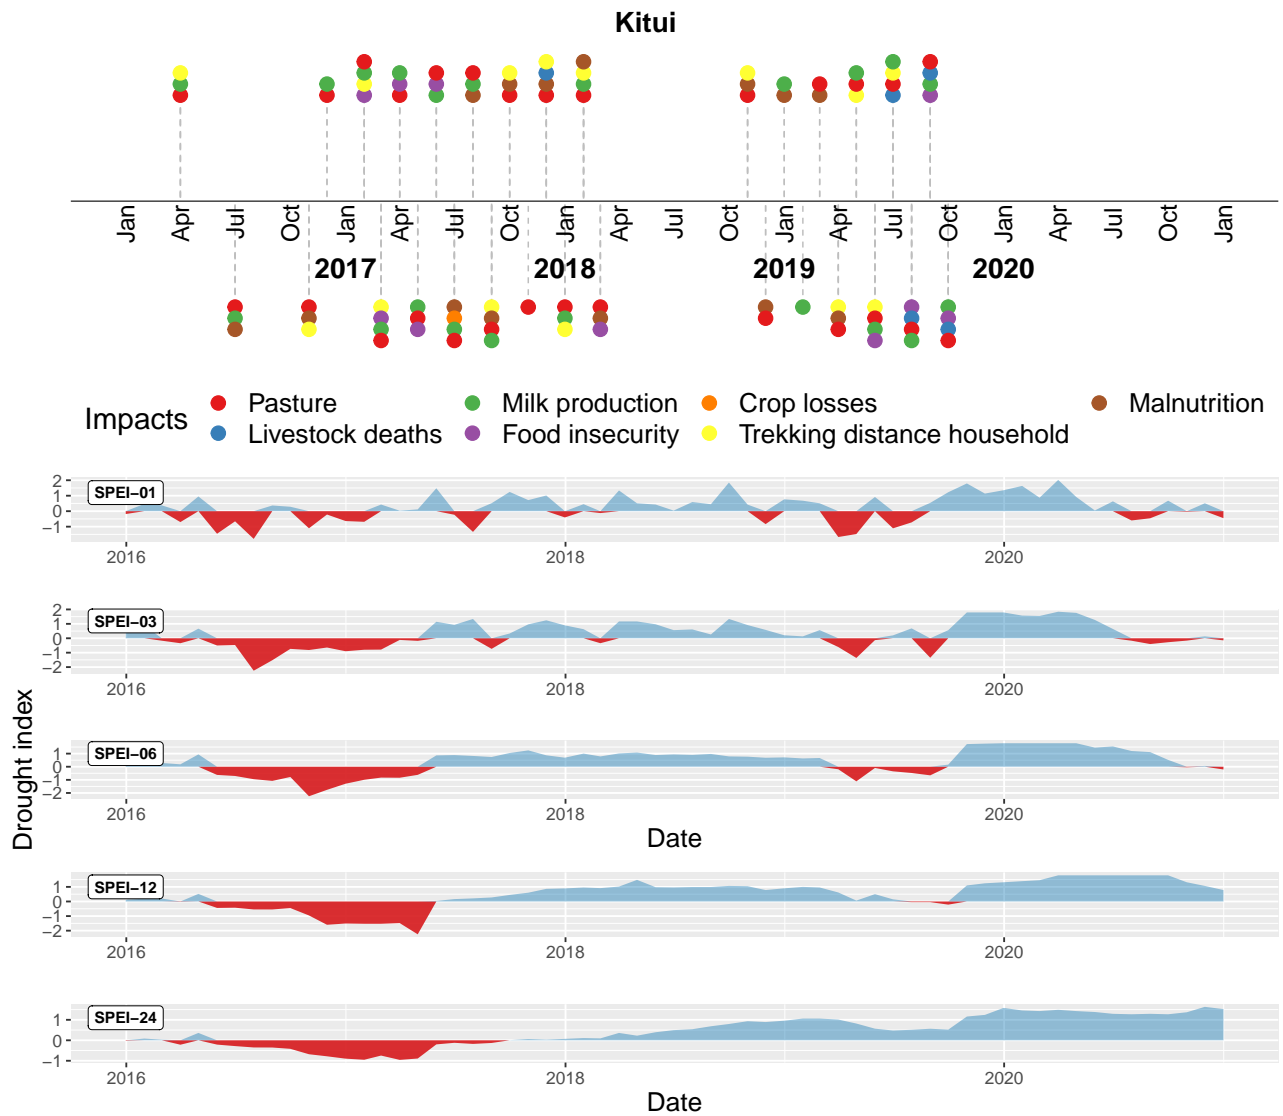

Figure S2: A time series of the drought index SPEI for different accumulation periods (1, 3, 6, 12 and 24 months) and a timeline with drought impacts for Kitui (semi-arid county). Negative values of SPEI indicate dryer than normal periods (red) while positive values indicate wetter than normal (blue)

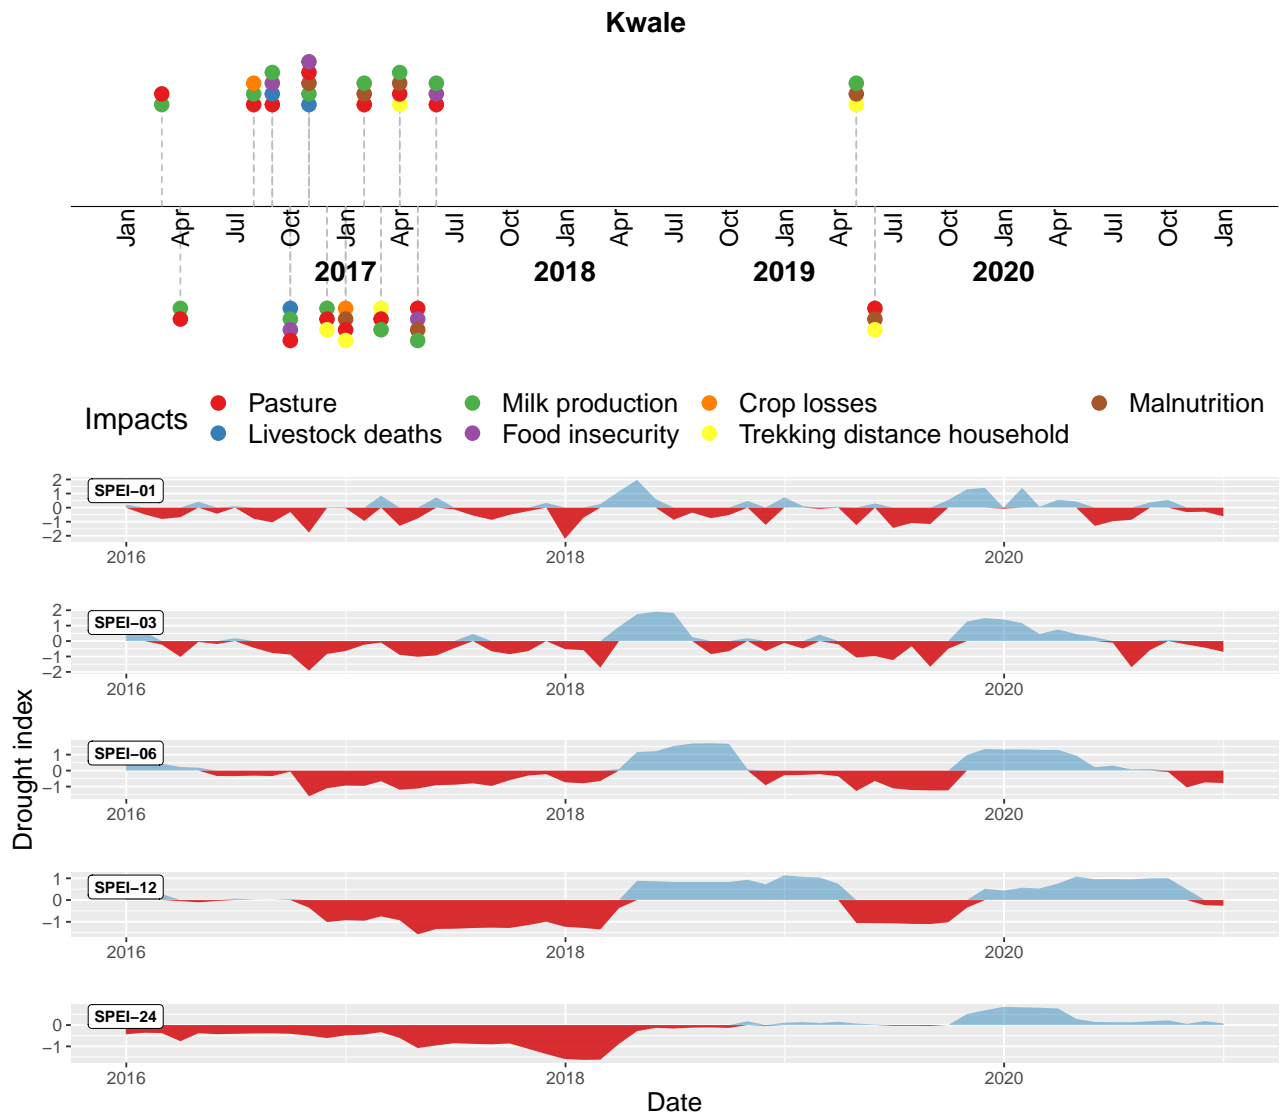

Figure S3: A time series of the drought index SPEI for different accumulation periods (1, 3, 6, 12 and 24 months) and a timeline with drought impacts for Kwale (semi-arid county). Negative values of SPEI indicate dryer than normal periods (red) while positive values indicate wetter than normal (blue)

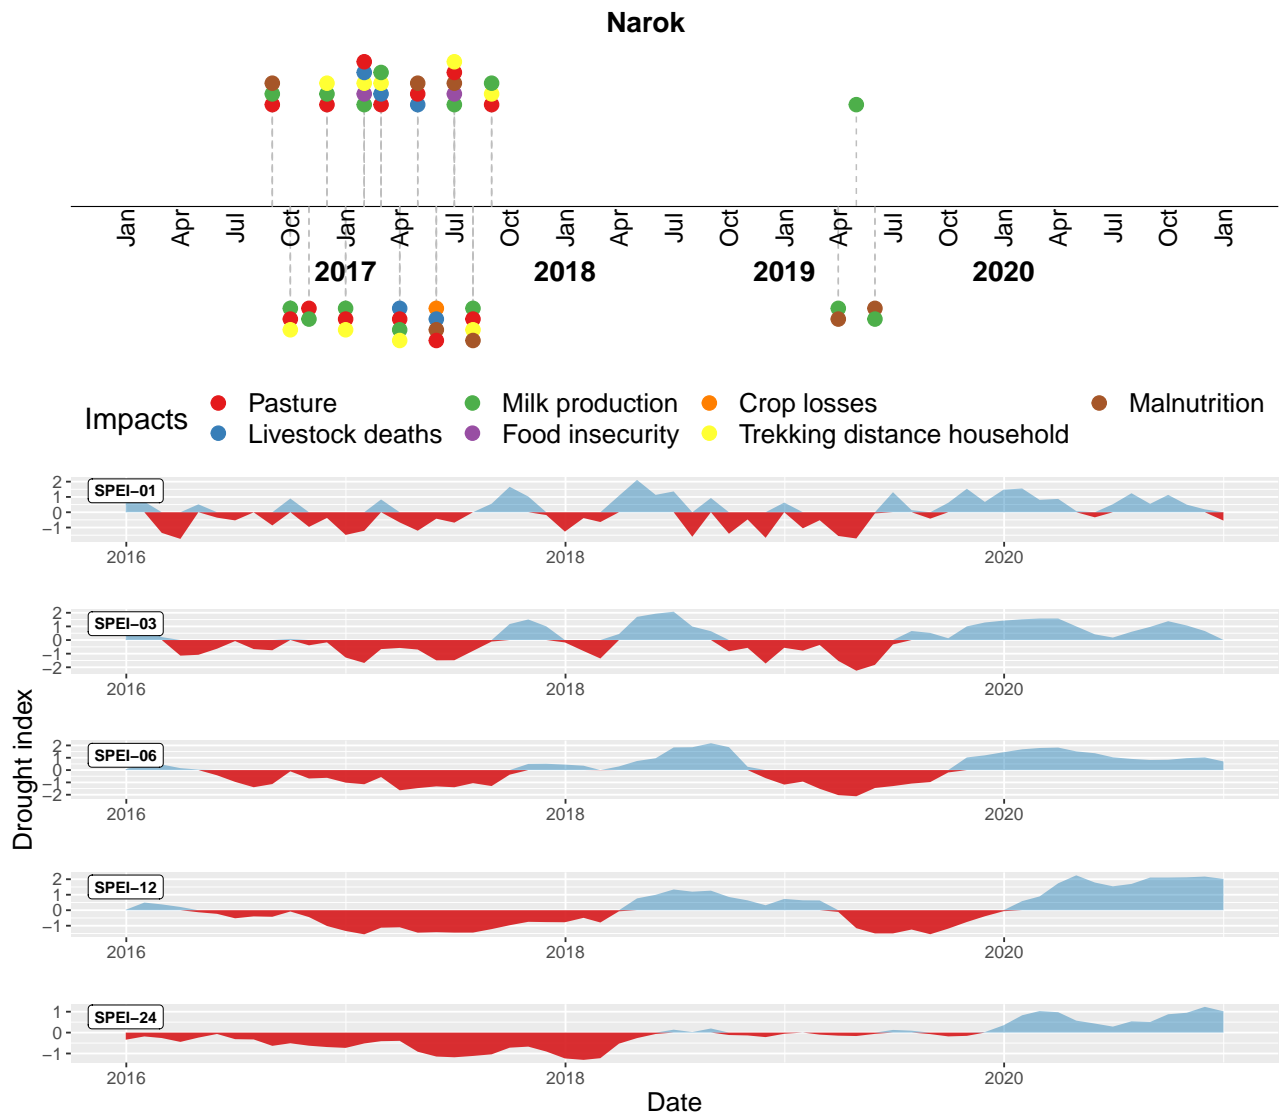

Figure S4: A time series of the drought index SPEI for different accumulation periods (1, 3, 6, 12 and 24 months) and a timeline with drought impacts for Narok (sub-humid county). Negative values of SPEI indicate dryer than normal periods (red) while positive values indicate wetter than normal (blue)
